# Supplementary material for: Differential effects, on oncogenic pathway signalling, by derivatives of the HNF4 α inhibitor BI6015
Source: PubMed Central journal article supplement (PMC6461897; doi:10.1038/s41416-018-0374-5), 2019-02-22
Supplement: 41416_2018_374_MOESM1_ESM.pdf [file 41416_2018_374_MOESM1_ESM.pdf]

# Supporting Information, Figure S1

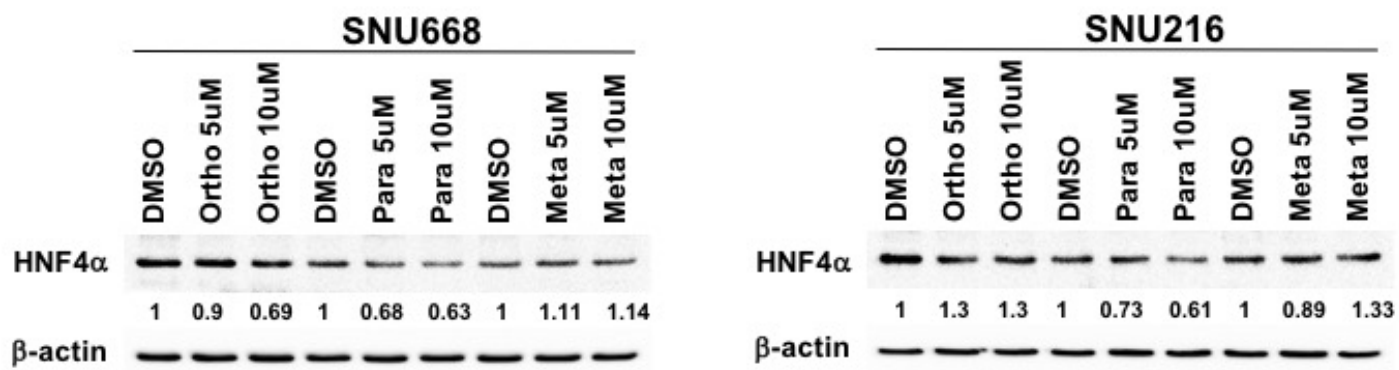

**Figure S1** Western blot analysis showing HNF4a protein levels in the 2 cell lines in two concentration 5 and 10  $\mu$ M of the three derivatives of BI6015.

# Supporting Information, Figure S2

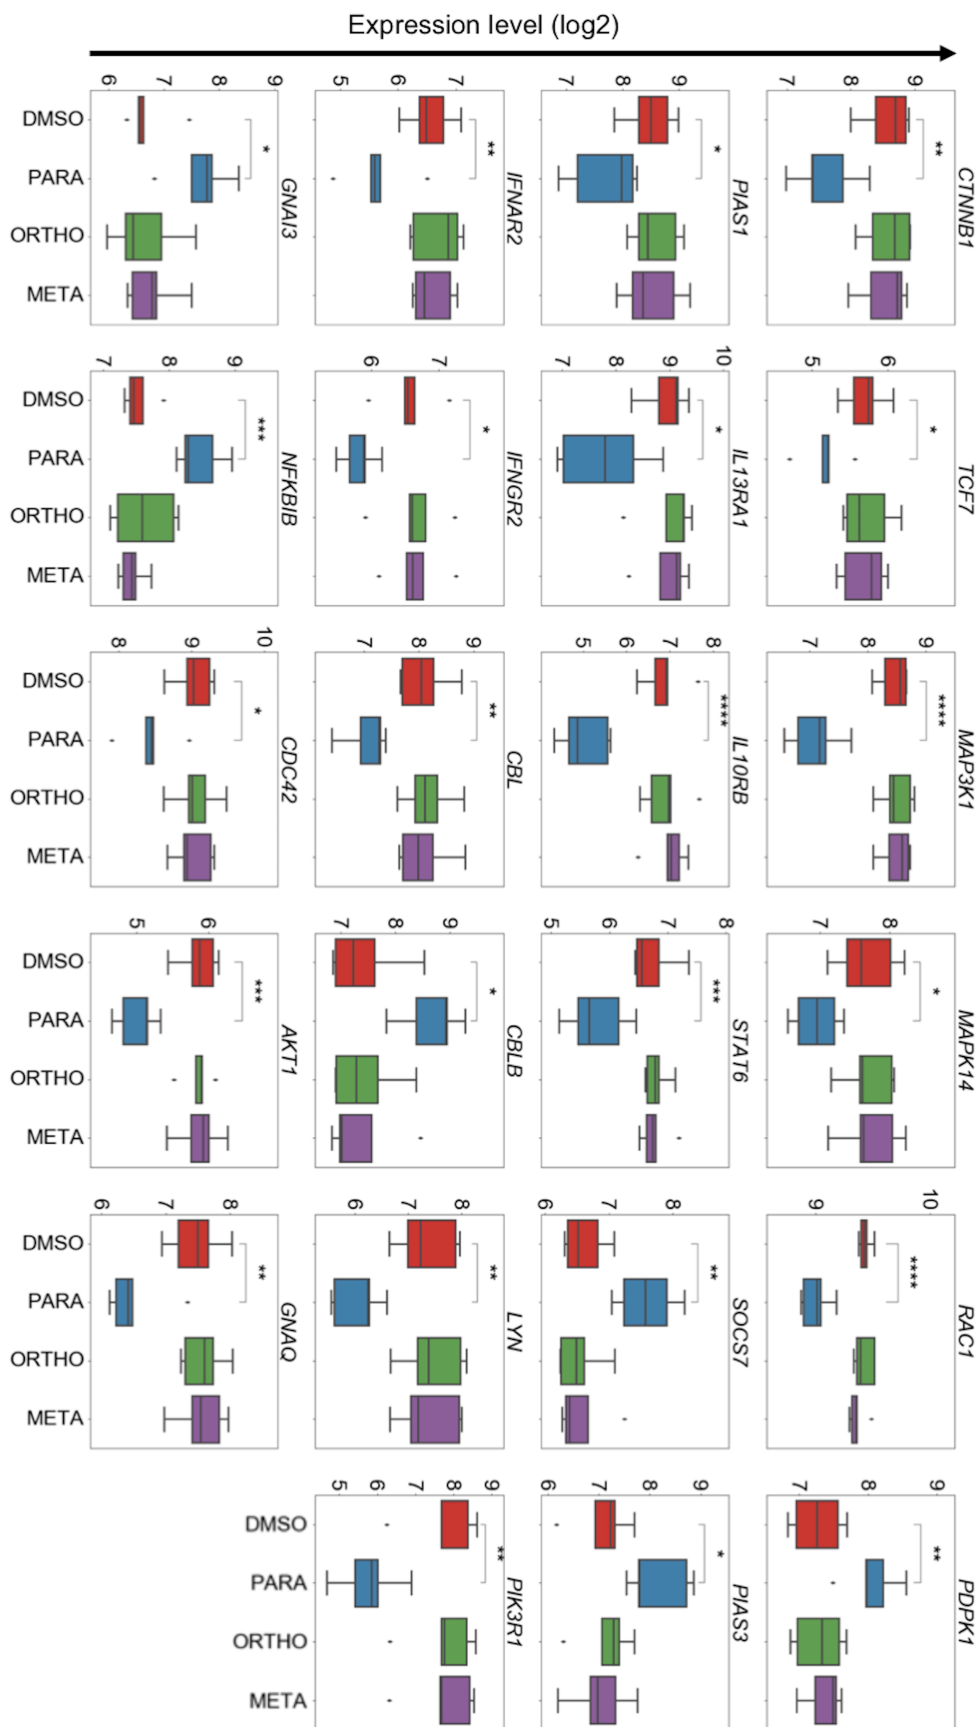

**Figure S2 Commonly detected genes of para-, ortho-, and meta-groups by differentially expressed sub-pathway analysis also showed different dysregulation patterns.** We tested a one-way ANOVA test with commonly detected genes by PATHOME among three treated groups, then presented twenty-three genes that were different expression patterns with significance (p-values were derived by one-way ANOVA test).

\*: p-value < 0.05, \*\*: p-value < 0.01, \*\*\*: p-value < 0.001, and \*\*\*\*: p-value < 0.0001.

# Supporting Information, Figure S3

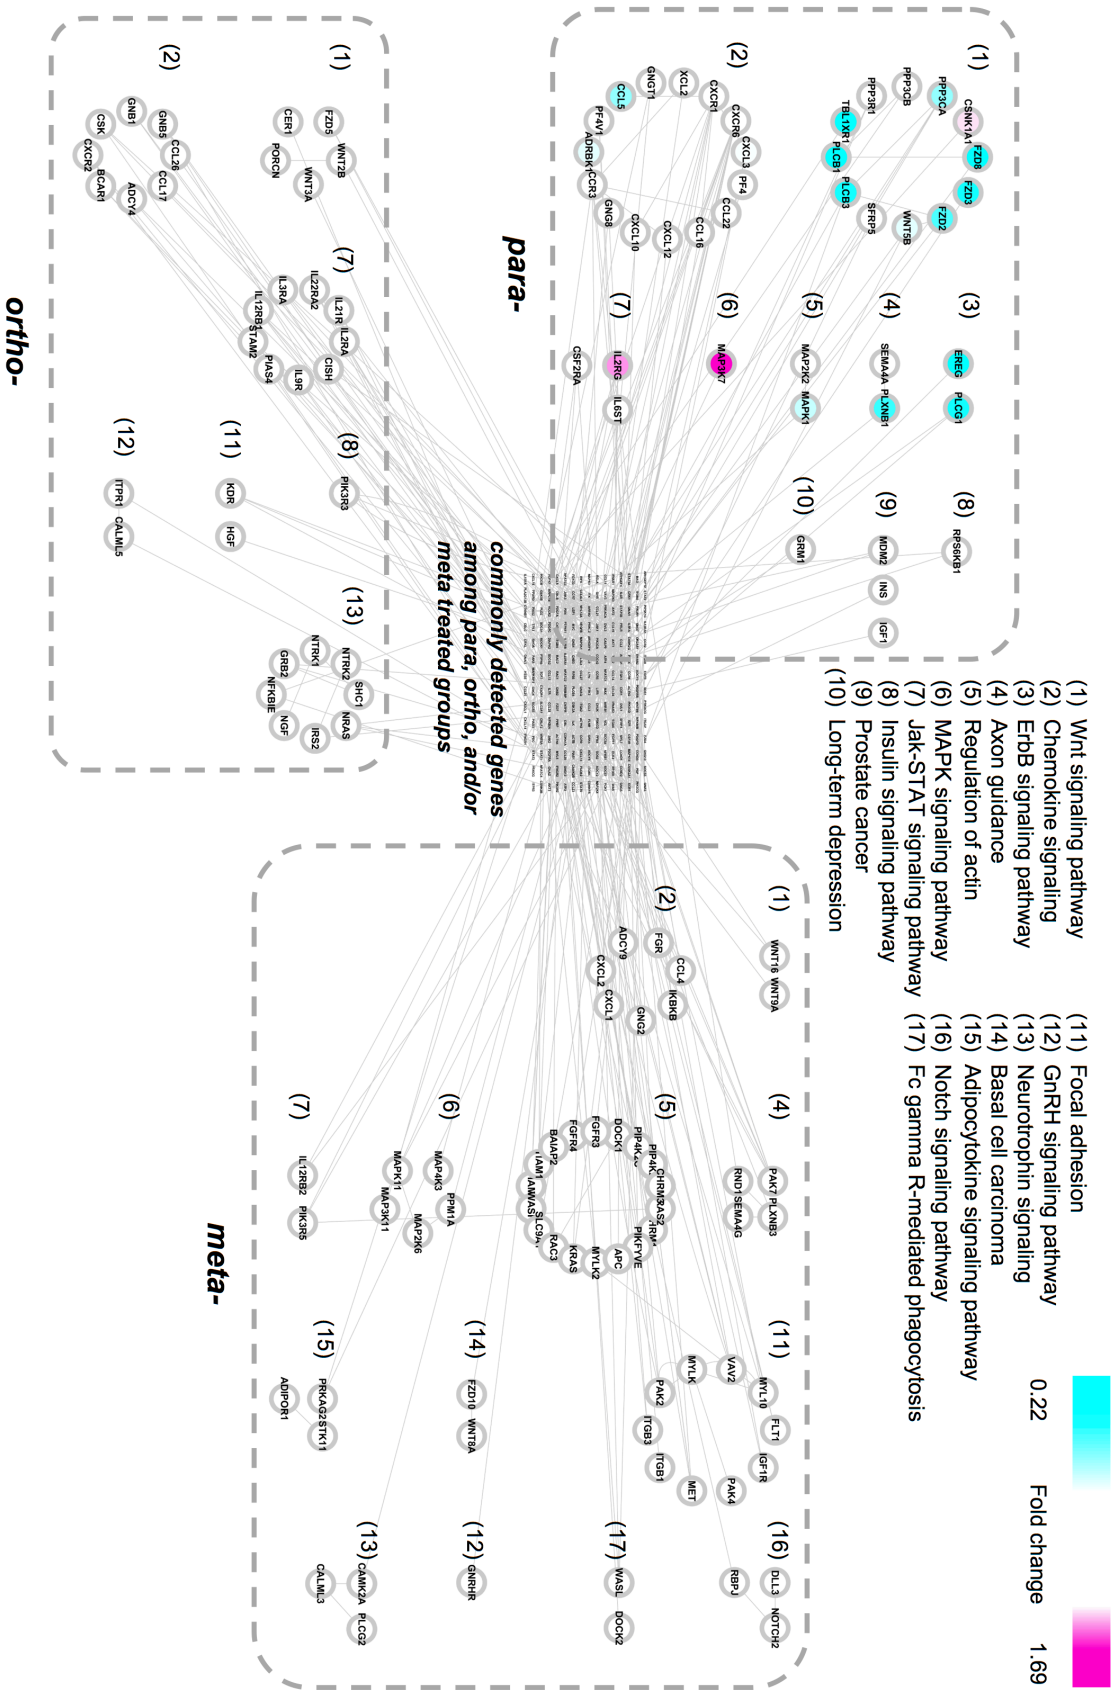

**Figure S3. Differentially expressed sub-pathway analysis showed different dysregulation patterns among para-, ortho-, and meta-groups.** The para treated group (top-left side) showed perturbed gene expression patterns comparing to the ortho or meta treated groups, especially in the Wnt signal pathway (marked as (1)). *FZD8*, *FZD3*, *FZD2*, *PLCB3*, *PLCB1*, *TBLIXR*, and *PPP3CA* (clock-wise) were down-regulated over DMSO groups, and *CSNK1A1* was up-regulated. However, genes of ortho and meta treated groups showed small changes in the Wnt signal pathway even though those genes were identified significantly in the sub-pathway analysis. And genes in the ErbB and Axon guidance signal pathway also showed dysregulated ((3) and (4) in this figure). We performed differentially expressed sub-pathway analysis using the PATHOME (PMID: 24681952). We merged three networks from the PATHOME and mapped fold change values to genes. We arranged genes in the pathway context. Genes that were detected among three groups were condensed into small dots. (1) Wnt signaling pathway (2) Chemokine signaling pathway (3) ErbB signaling pathway (4) Axon guidance (5) Regulation of actin cytoskeleton (6) MAPK signaling pathway (7) Jak-STAT signaling pathway (8) Insulin signaling pathway (9) Prostate cancer (10) Long-term depression (11) Focal adhesion (12) GnRH signaling pathway (13) Neurotrophin signaling pathway (14) Basal cell carcinoma (15) Adipocytokine signaling pathway (16) Notch signaling pathway (17) Fc gamma R-mediated phagocytosis.

# Supporting Information, Table S1

**Table S1 ANOVA test result and their signal pathway context.**

| Detected groups <sup>a</sup> | Gene Symbol | KEGG signal pathway context                                                                | F value | p-value  |
|------------------------------|-------------|--------------------------------------------------------------------------------------------|---------|----------|
| O/P/M                        | CTNNB1      | Wnt signaling pathway                                                                      | 6.935   | 0.0033   |
| P/O                          | TCF7        | Wnt signaling pathway                                                                      | 3.938   | 0.0279   |
| P/M                          | MAP3K1      | MAPK signaling pathway                                                                     | 22.739  | 5.16E-06 |
| P/M                          | MAPK14      | MAPK signaling pathway                                                                     | 4.281   | 0.0212   |
| P/M                          | GNAQ        | Long-term depression; GnRH signaling pathway                                               | 7.782   | 0.0019   |
| O/P/M                        | CBL         | Jak-STAT signaling pathway                                                                 | 6.753   | 0.0037   |
| O/P/M                        | CBLB        | Jak-STAT signaling pathway                                                                 | 4.913   | 0.0131   |
| O/P/M                        | PIAS3       | Jak-STAT signaling pathway                                                                 | 4.357   | 0.02     |
| O/P/M                        | SOCS7       | Jak-STAT signaling pathway                                                                 | 8.388   | 0.0014   |
| O/P/M                        | STAT6       | Jak-STAT signaling pathway                                                                 | 9.247   | 0.0008   |
| P/M                          | IFNAR2      | Jak-STAT signaling pathway                                                                 | 4.849   | 0.0138   |
| P/M                          | IFNGR2      | Jak-STAT signaling pathway                                                                 | 5.847   | 0.0067   |
| P/M                          | IL10RB      | Jak-STAT signaling pathway                                                                 | 17.531  | 2.60E-05 |
| P/O                          | IL13RA1     | Jak-STAT signaling pathway                                                                 | 5.231   | 0.0104   |
| P/O                          | PIAS1       | Jak-STAT signaling pathway                                                                 | 3.243   | 0.0498   |
| P/O                          | PDPK1       | Insulin signaling pathway; Endometrial cancer; Prostate cancer; Non-small cell lung cancer | 5.588   | 0.0081   |
| O/P/M                        | AKT1        | Chemokine signaling pathway; Jak-STAT signaling pathway; Prostate cancer                   | 12.008  | 0.0002   |
| O/P/M                        | CDC42       | Chemokine signaling pathway                                                                | 4.535   | 0.0174   |
| O/P/M                        | GNAI3       | Chemokine signaling pathway                                                                | 4.147   | 0.0236   |
| O/P/M                        | PIK3R1      | Chemokine signaling pathway                                                                | 6.243   | 0.0051   |
| P/M                          | LYN         | Chemokine signaling pathway                                                                | 7.243   | 0.0027   |
| P/M                          | NFKBIB      | Chemokine signaling pathway                                                                | 9.86    | 0.0006   |
| P/M                          | RAC1        | Axon guidance                                                                              | 26.844  | 1.75E-06 |

<sup>a</sup>O: Ortho-treated group, P:Para-treated group, and M:Meta-treated group

## Supporting Information, Table S2

**Table S2 Differentially expressed genes of WNT/ $\beta$  catenin signal pathway**

| <b>Gene symbol</b> | <b>FC PARA</b> | <b>p-value Para</b> | <b>FC Ortho</b> | <b>p-value Ortho</b> | <b>FC Meta</b> | <b>p-value Meta</b> |
|--------------------|----------------|---------------------|-----------------|----------------------|----------------|---------------------|
| <b>AXIN1</b>       | 0.603          | 0.001               | 1.069           | 0.415                | 1.033          | 0.633               |
| <b>CTNNB1</b>      | 0.507          | 0.008               | 1.011           | 0.950                | 0.972          | 0.870               |
| <b>DKK1</b>        | 0.093          | 0.001               | 1.049           | 0.923                | 1.076          | 0.889               |
| <b>HDAC2</b>       | 0.596          | 0.001               | 1.061           | 0.571                | 1.071          | 0.456               |
| <b>KAT2A</b>       | 0.300          | 0.005               | 0.946           | 0.834                | 0.971          | 0.913               |
| <b>SKP2</b>        | 0.190          | 0.001               | 1.041           | 0.886                | 1.055          | 0.853               |
| <b>TCF7</b>        | 0.690          | 0.020               | 1.016           | 0.910                | 0.993          | 0.958               |
| <b>PPARD</b>       | 1.892          | 0.003               | 1.043           | 0.806                | 0.972          | 0.868               |
| <b>CCND2</b>       | 1.517          | 0.032               | 1.074           | 0.167                | 1.105          | 0.079               |
| <b>HDAC5</b>       | 2.167          | 0.015               | 0.970           | 0.901                | 1.000          | 1.000               |
